# Supplementary material for: Improved measurement of disease progression in people living with early Parkinson’s disease using digital health technologies
Source: PubMed Central journal article supplement (PMC10942994; doi:10.1038/s43856-024-00481-3), 2024-03-15
Supplement: 43856_2024_481_MOESM2_ESM.pdf [file 43856_2024_481_MOESM2_ESM.pdf]

## SUPPLEMENTARY INFORMATION

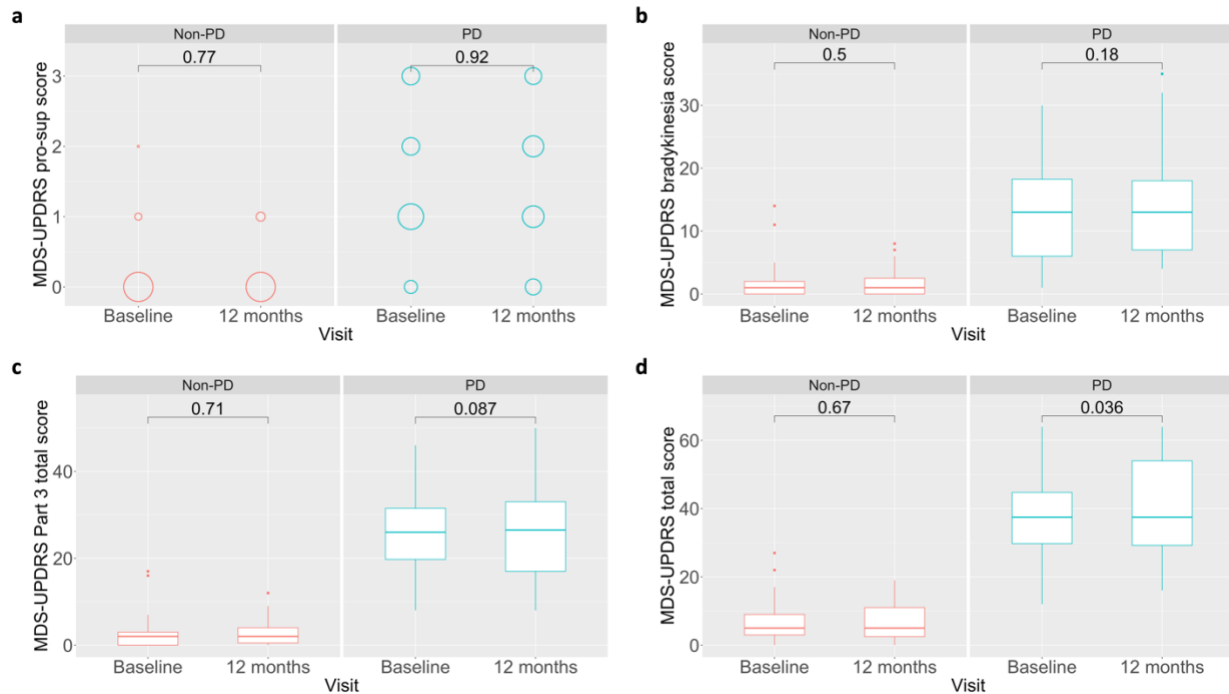

Supplementary Figure 1. MDS-UPDRS pronation-supination, bradykinesia, part 3 total, and total score sensitivity (paired Wilcoxon signed-rank test) to 1 year progression in PD patients. (a, b, c) MDS-UPDRS pronation-supination, bradykinesia, and part 3 total score do not significantly differ between baseline and 12-month visits in either PD or healthy participants, although part 3 total score ( $p=0.087$ ) trends toward significance with PD patients. (d) MDS-UPDRS total score significantly distinguishes between baseline and 12-month visits in PD participants ( $p=0.036$ ) but does not in healthy participants ( $p=0.67$ ).

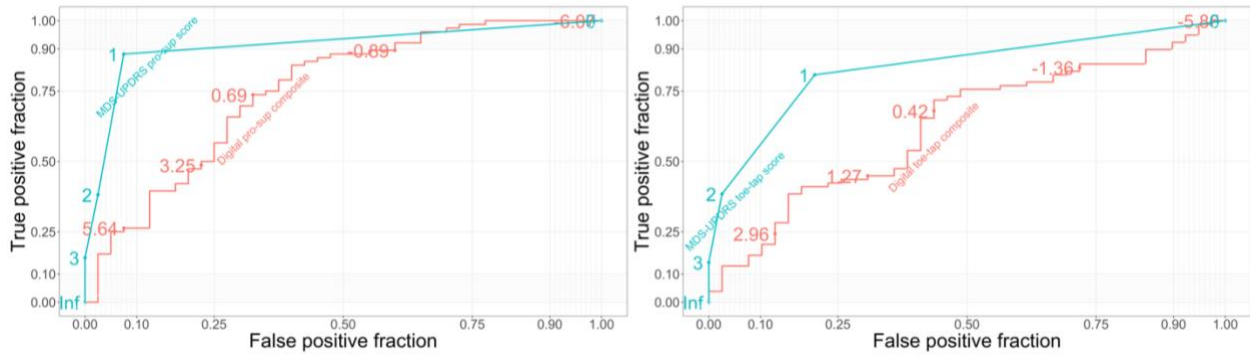

Supplementary Figure 2. ROC curve demonstrating known groups sensitivity of digital composite and MDS-UPDRS sub-scores for pronation-supination and toe-tapping for distinguishing PD from non-PD participants. Both pronation-supination (AUC=0.751) and toe-tapping (AUC=0.624) digital composites demonstrate moderate diagnostic discrimination. MDS-UPDRS pronation-supination (AUC=0.910) and toe-tapping (AUC=0.832) scores show good diagnostic sensitivity.

| Digital feature/clinical score | Pronation-supination Non-PD BL vs. 12m | Pronation-supination PD BL vs. 12m | Toe-tapping Non-PD BL vs. 12m | Toe-tapping PD BL vs. 12m |
|--------------------------------|----------------------------------------|------------------------------------|-------------------------------|---------------------------|
| Frequency (median)             | 0.073                                  | 0.4                                | ↑0.0025                       | 0.99                      |
| Frequency (var)                | 0.87                                   | 0.17                               | 0.93                          | 0.93                      |
| Frequency (slope)              | 0.067                                  | 0.53                               | 0.58                          | ↓0.03                     |
| Amplitude (median)             | ↑0.037                                 | 0.2                                | 0.74                          | 0.15                      |
| Amplitude (var)                | 0.95                                   | 0.14                               | 0.46                          | 0.5                       |
| Amplitude (slope)              | 0.22                                   | ↓0.0015                            | 0.29                          | 0.22                      |
| Max velocity (median)          | ↑0.011                                 | 0.48                               | ↑0.04                         | 0.055                     |
| Max velocity (var)             | 0.084                                  | 0.12                               | ↓0.025                        | 0.83                      |
| Max velocity (slope)           | ↓0.0028                                | ↓0.001                             | 0.15                          | 0.7                       |
| Composite                      | 0.9                                    | ↑0.018                             | ↓0.011                        | ↑0.011                    |
| MDS-UPDRS sub-score            | 0.77                                   | 0.92                               | 0.77                          | 0.62                      |

$p > 0.05$ ;  $\leq 0.05$

Supplementary Table 1. Digital composite and individual feature sensitivity (paired Wilcoxon signed-rank test) to 1 year progression.

| Digital feature/clinical score | Pronation-supination digital vs. clinical score | Pronation-supination PD vs. non-PD | Toe-tapping digital vs. clinical score | Toe-tapping PD vs. non-PD |
|--------------------------------|-------------------------------------------------|------------------------------------|----------------------------------------|---------------------------|
| Frequency (median)             | 0.21                                            | 0.024                              | 0.17                                   | 0.017                     |
| Frequency (var)                | 0.15                                            | 0.35                               | 0.78                                   | 0.26                      |
| Frequency (slope)              | 0.75                                            | <0.001                             | 0.75                                   | 0.12                      |
| Amplitude (median)             | 0.0057                                          | <0.001                             | 0.19                                   | 0.017                     |
| Amplitude (var)                | 0.99                                            | 0.16                               | 0.016                                  | 0.0094                    |
| Amplitude (slope)              | 0.82                                            | 0.071                              | 0.61                                   | 0.13                      |
| Max velocity (median)          | 0.037                                           | <0.001                             | 0.011                                  | 0.0058                    |
| Max velocity (var)             | 0.094                                           | 0.025                              | 0.65                                   | 0.25                      |
| Max velocity (slope)           | 0.068                                           | 0.0025                             | 0.19                                   | 0.018                     |
| Composite                      | 0.028                                           | <0.001                             | 0.0011                                 | 0.029                     |
| MDS-UPDRS sub-score            | NA                                              | <0.001                             | NA                                     | <0.001                    |

$p > 0.05$ ;  $\leq 0.05$

Supplementary Table 2. Convergent (Kruskal-Wallis test) and known-groups (Wilcoxon signed-rank test) validity of digital composite and individual features and associated MDS-UPDRS sub-scores at baseline visit. One individual digital feature, median max velocity, significantly varied with clinical scores for both pronation-supination (Kruskal-Wallis  $p=0.037$ ) and toe-tapping (Kruskal-Wallis  $p=0.011$ ) (Supp. Table 2). Additionally, median amplitude varied significantly with clinical score for pronation-supination assessments (Kruskal-Wallis  $p=0.006$ ), and variability of amplitude varied significantly with clinical score for toe-tapping assessments (Kruskal-Wallis  $p=0.011$ ). Median frequency, median amplitude, median max velocity, and slope max velocity all significantly distinguished between PD and non-PD for both pronation-supination and toe-tapping assessments. Slope frequency and variability of max velocity significantly distinguished between PD and non-PD for pronation-supination, but not for toe-tapping. In contrast, variability of amplitude distinguished between PD and non-PD for toe-tapping, but not for pronation-supination.

| Non-PD participant digital feature | Pronation-supination Baseline vs. 1 month | Pronation-supination 9 months vs. 12 months | Toe-tapping Baseline vs. 1 month | Toe-tapping 9 months vs. 12 months |
|------------------------------------|-------------------------------------------|---------------------------------------------|----------------------------------|------------------------------------|
| Frequency (median)                 | 0.67                                      | 0.82                                        | 0.6                              | 0.78                               |
| Frequency (var)                    | 0.29                                      | 0.69                                        | 0.47                             | 0.39                               |
| Frequency (slope)                  | 0.23                                      | 0.58                                        | 0.34                             | 0.38                               |
| Amplitude (median)                 | 0.38                                      | 0.75                                        | 0.73                             | 0.67                               |
| Amplitude (var)                    | 0.04                                      | 0.31                                        | 0.52                             | 0.52                               |
| Amplitude (slope)                  | 0.44                                      | 0.19                                        | 0.43                             | 0.09                               |
| Max velocity (median)              | 0.71                                      | 0.87                                        | 0.46                             | 0.46                               |
| Max velocity (var)                 | 0.27                                      | 0.38                                        | 0.29                             | 0.53                               |
| Max velocity (slope)               | 0.00                                      | 0.44                                        | 0.06                             | 0.00                               |
| Digital composite                  | 0.40                                      | 0.75                                        | 0.5                              | 0.3                                |

ICC <= 0.4; 0.4 to 0.74; >= 0.75

Supplementary Table 3. Test-retest reliability (intra-class correlation coefficients) of digital composites and individual features between visits in healthy participants. Between baseline and 1-month visits, individual digital features for pronation-supination (ICCs = 0-0.71) and toe-tapping (ICCs = 0.06-0.73) varied between good and poor test-retest reliability.

| PD patient digital feature | Pronation-supination Baseline vs. 1 month | Pronation-supination 9 months vs. 12 months | Toe-tapping Baseline vs. 1 month | Toe-tapping 9 months vs. 12 months |
|----------------------------|-------------------------------------------|---------------------------------------------|----------------------------------|------------------------------------|
| Frequency (median)         | 0.62                                      | 0.68                                        | 0.65                             | 0.66                               |
| Frequency (var)            | 0.34                                      | 0.59                                        | 0.46                             | 0.54                               |
| Frequency (slope)          | 0.00                                      | 0.69                                        | 0.26                             | 0.48                               |
| Amplitude (median)         | 0.65                                      | 0.58                                        | 0.49                             | 0.71                               |
| Amplitude (var)            | 0.34                                      | 0.24                                        | 0.15                             | 0.40                               |
| Amplitude (slope)          | 0.21                                      | 0.00                                        | 0.15                             | 0.39                               |
| Max velocity (median)      | 0.64                                      | 0.74                                        | 0.51                             | 0.33                               |
| Max velocity (var)         | 0.40                                      | 0.46                                        | 0.34                             | 0.16                               |
| Max velocity (slope)       | 0.15                                      | 0.40                                        | 0.37                             | 0.35                               |
| Digital composite          | 0.52                                      | 0.69                                        | 0.31                             | 0.49                               |

ICC <= 0.4; 0.4 to 0.74; >= 0.75

Supplementary Table 4. Test-retest reliability (intra-class correlation coefficients) of digital composites and individual features between visits in PD participants. Between baseline and 1-month visits, individual digital features for pronation-supination ( $0 < ICC < 0.65$ ) and toe-tapping ( $0.15 < ICC < 0.65$ ) varied between good to poor test-retest reliability.

## Supplementary Note

```
##### Signal processing and peak detection

# second order Butterworth band-pass filter [0.3 20]

fs=128; lowcut = 0.3; highcut = 20.0

nyq = 0.5 * fs

low = lowcut / nyq

high = highcut / nyq

sos = butter(2, [low, high], analog=False, btype='band', output='sos')

df['eul_roll_bp'] = sosfiltfilt(sos, df['eul_roll'])

# spline interpolation with smoothing

tck = interpolate.splrep(df['time'], df['eul_roll_bp'], s=len(df['time']))

df['eul_roll_bp_ssi'] = interpolate.splev(df['time'], tck)

# peak detection

maxima_eul = find_peaks(df['eul_roll_bp_ssi'])

minima_eul = find_peaks(-df['eul_roll_bp_ssi'])

##### Feature extraction

# amplitude (difference in amplitude between peak to valley) of each movement is derived

# max velocity (maximum gyroscope amplitude between peak and valley) of each movement is
derived

# frequency (inverse of time between consecutive peaks) of each movement is derived
```

```
# median, standard deviation, and slope features are extracted for amplitude, max velocity, and  
frequency (ie. frequency feature extraction represented below)
```

```
med_frequency = statistics.median(frequency_list)
```

```
std_frequency = statistics.stdev(frequency_list)
```

```
slope_frequency = np.median(frequency_list[-math.ceil(len(frequency_list)/3):]) -  
np.median(frequency_list[0:math.ceil(len(frequency_list) / 3)])
```
