# Supplementary material for: Improved measurement of disease progression in people living with early Parkinson’s disease using digital health technologies
Source: PubMed Central journal article supplement (PMC10942994; doi:10.1038/s43856-024-00481-3), 2024-03-15
Supplement: 43856_2024_481_MOESM3_ESM.pdf [file 43856_2024_481_MOESM3_ESM.pdf]

1 **Description of Additional Supplementary Files**

2

3 **File Name:** Supplementary Source Data

4 **Description:** Supplementary source data for figures 2, 3, 4 and 5.
